# Supplementary material
Source: ML conference proceedings conference paper supplement (https://openaccess.thecvf.com/content/ICCV2025/html/Wang_Toward_Fair_and_ICCV_2025_paper.html)
Supplement: Supplementary file 1 [file Wang_Toward_Fair_and_ICCV_2025_supplemental.pdf]

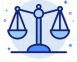

# Toward Fair and Accurate Cross-Domain Medical Image Segmentation: A VLM-Driven Active Domain Adaptation Paradigm

## Supplementary Material

001 This is the supplementary material for *Toward Fair and*  
002 *Accurate Cross-Domain Medical Image Segmentation: A*  
003 *VLM-Driven Active Domain Adaptation Paradigm*. We  
004 present the following materials:

- 005 • Sec. 1 The more details of evaluation metrics we used.
- 006 • Sec. 2 The more experiments (about different attributes)
- 007 and related ablation studies.
- 008 • Sec. 3 A brief introduction to our comparative methods.
- 009 • Sec. 4 More visualizations of VLM-attribute learning.

### 010 1. Details of Evaluation Metrics

011 For quantifying fairness in medical image segmentation,  
012 we adopt the same metrics used in previous studies [1, 5,  
013 7]: Dice, IoU, and the important composite metrics, ES-  
014 Dice and ES-IoU, to assess fairness alongside performance.  
015 More detailed information will be added as follows.

016 For Equity-Scaled metrics, we first need to compute a  
017 performance discrepancy  $\Delta$  for every sensitive attribute.  
018 This discrepancy is characterized by the cumulative differ-  
019 ence between each demographic subgroup’s metric and the  
020 overall performance. It is articulated in the following for-  
021 mulation:

$$\Delta = \sum_{A \in \text{attrs}} |M(\{\hat{y}, y\}) - M(\{\hat{y}, y, a\} | a = A)|, \quad (1)$$

022 where *attrs* represent demographic groups such as  
023 {Female, Male}, {Asian, Black, White}, or {Hispanic,  
024 Non-Hispanic, Unknown}, *M* denotes a specific metric  
025 (e.g., Dice or IoU), and  $\hat{y}$  is the ground truth. A positive  $\Delta$   
026 value implies that smaller values correspond to reduced per-  
027 formance disparities among demographic groups relative to  
028 the overall performance, indicating improved fairness. The  
029 Equity-Scaled metric can be formulated as follows:  
030

$$\text{ESM} = \frac{M(\{\hat{y}, y\})}{1 + \Delta}. \quad (2)$$

031 Through the above steps, we can calculate the ES-Dice and  
032 ES-IoU metrics.  
033

### 034 2. More Experiments

035 **More Experiments on Other Attribute.** To further vali-  
036 date the generalizability of our method, we conducted ex-  
037 periments across another sensitive attribute (Gender) and  
038 performed a comprehensive comparison with state-of-the-

art Domain Adaptation (DA) and Active Domain Adapta-  
039 tion (ADA) approaches. All ADA methods were evalu-  
040 ated under the same labeling quota to ensure fair compar-  
041 isons. As shown in Table 1, our method significantly out-  
042 performs all DA and ADA methods across key metrics. For  
043 instance, in rim segmentation tasks, our approach achieves  
044 an ES-Dice score of 0.785 and ES-IoU of 0.661, surpass-  
045 ing previous methods by a notable margin. Statistical anal-  
046 ysis ( $P$ -value  $< 0.05$ ) further confirms the significant su-  
047 periority of our framework in improving performance and  
048 fairness. These results highlight our method’s ability to  
049 address cross-domain challenges while ensuring equitable  
050 outcomes for diverse demographic subgroups.  
051

**Detailed Ablation Studies.** Our ablation study, conducted  
052 after VLM learning, encompasses four main configura-  
053 tions: 1) Fair-Base: This configuration adheres to the Fair  
054 Quota principle by randomly selecting samples with an  
055 equal quota across different subgroups of the same sen-  
056 sitive attribute, resulting in the final selection list *S*. 2)  
057 Fair-Attr: Building on the Fair Quota framework, this setup  
058 exclusively employs the Attribute representative selection  
059 method to choose samples from each subgroup, culminat-  
060 ing in the selection list *S*. 3) Fair-Poly: Maintaining the same  
061 quota, this configuration focuses on selecting samples with  
062 Polysemy representatives within each subgroup to form the  
063 final list *S*. 4) Our Fair-AP: Our approach enhances the  
064 balanced allocation strategy of Fair-Base by prioritizing the  
065 selection of samples that integrate both Attribute and Pol-  
066 ysemy considerations, thereby augmenting representation  
067 and diversity, and resulting in the final selection list *S*. The  
068 ablation study results for each sensitive attribute (gender,  
069 race, and ethnicity) are displayed in Table 2, Table 3, and  
070 Table 4, respectively.  
071

**Gender Attribute:** In Table 2, the standalone application of  
072 Fair-Attr or Fair-Poly demonstrates potential for enhancing  
073 certain metrics, while the observed improvements exhibit  
074 variability, suggesting limited consistency in performance  
075 across all evaluation criteria. However, it is evident that  
076 our Fair-AP comprehensively considers both attribute rep-  
077 resentative and polysemy representative, ensuring superior  
078 performance and fairness.  
079

**Race Attribute:** The findings from the ablation study on  
080 racial attributes indicate that if the distribution of various  
081 races is imbalanced, both Fair-Attr and Fair-Poly show im-  
082 provements in some performance measures (like ES-IoU  
083 and IoU for Cup), as illustrated in Table 3. Our Fair-AP  
084

Table 1. Cup and rim segmentation performance on the FairDomain-Segmentation benchmark using different DA and ADA methods with **Gender** as the demographic attribute. The \* denotes  $p$ -value  $< 0.05$  in all paired  $t$ -test, indicating statistically significant differences.

|                |                   | Method           | Venue         | Overall ES-Dice $\uparrow$ | Overall Dice $\uparrow$ | Overall ES-IoU $\uparrow$ | Overall IoU $\uparrow$ | Male Dice $\uparrow$ | Female Dice $\uparrow$ | Male IoU $\uparrow$ | Female IoU $\uparrow$ |
|----------------|-------------------|------------------|---------------|----------------------------|-------------------------|---------------------------|------------------------|----------------------|------------------------|---------------------|-----------------------|
| Cup            | Baseline (Source) | -                | -             | 0.885                      | 0.888                   | 0.806                     | 0.808                  | 0.886                | 0.889                  | 0.807               | 0.810                 |
|                | Baseline (Target) | -                | -             | 0.688                      | 0.700                   | 0.535                     | 0.555                  | 0.693                | 0.711                  | 0.557               | 0.574                 |
| Rim            | Baseline (Source) | -                | -             | 0.854                      | 0.861                   | 0.753                     | 0.762                  | 0.864                | 0.856                  | 0.767               | 0.755                 |
|                | Baseline (Target) | -                | -             | 0.485                      | 0.495                   | 0.336                     | 0.342                  | 0.486                | 0.507                  | 0.334               | 0.353                 |
| DA             | Cup               | PixMatch [6]     | CVPR'21       | 0.768                      | 0.775                   | 0.650                     | 0.660                  | 0.772                | 0.769                  | 0.645               | 0.660                 |
|                |                   | DAFormer [4]     | CVPR'22       | 0.781                      | 0.785                   | 0.676                     | 0.680                  | 0.783                | 0.789                  | 0.678               | 0.684                 |
|                |                   | DAFormer-FIA [7] | ECCV'24       | 0.802                      | 0.810                   | 0.692                     | 0.700                  | 0.806                | 0.816                  | 0.695               | 0.706                 |
|                | Rim               | PixMatch [6]     | CVPR'21       | 0.660                      | 0.673                   | 0.519                     | 0.523                  | 0.669                | 0.688                  | 0.519               | 0.528                 |
|                |                   | DAFormer [4]     | CVPR'22       | 0.344                      | 0.345                   | 0.212                     | 0.213                  | 0.344                | 0.347                  | 0.212               | 0.214                 |
|                |                   | DAFormer-FIA [7] | ECCV'21       | 0.528                      | 0.531                   | 0.367                     | 0.369                  | 0.533                | 0.528                  | 0.372               | 0.366                 |
| ADA            | Cup               | Random           | -             | 0.828                      | 0.834                   | 0.729                     | 0.734                  | 0.838                | 0.831                  | 0.738               | 0.731                 |
|                |                   | Entropy [10]     | CVPR'19       | 0.819                      | 0.823                   | 0.717                     | 0.721                  | 0.826                | 0.821                  | 0.724               | 0.719                 |
|                |                   | MHPL [2]         | CVPR'23       | 0.829                      | 0.834                   | 0.728                     | 0.733                  | 0.838                | 0.832                  | 0.738               | 0.730                 |
|                |                   | DML-Core [9]     | NeurIPS'24    | 0.831                      | 0.839                   | 0.733                     | 0.740                  | 0.844                | 0.835                  | 0.746               | 0.736                 |
|                |                   | Detective [11]   | CVPR'24       | 0.831                      | 0.837                   | 0.733                     | 0.740                  | 0.841                | 0.834                  | 0.745               | 0.736                 |
|                |                   | STDR [3]         | IEEE TMI'24   | 0.831                      | 0.837                   | 0.731                     | 0.738                  | 0.842                | 0.834                  | 0.743               | 0.734                 |
|                | Our FairAP        | -                | <b>0.839*</b> | <b>0.843*</b>              | <b>0.742*</b>           | <b>0.746*</b>             | <b>0.845</b>           | <b>0.841*</b>        | <b>0.749*</b>          | <b>0.744*</b>       |                       |
|                | Rim               | Random           | -             | 0.778                      | 0.780                   | 0.652                     | 0.654                  | 0.779                | 0.782                  | 0.652               | 0.655                 |
|                |                   | Entropy [10]     | CVPR'19       | 0.768                      | 0.772                   | 0.639                     | 0.643                  | 0.769                | 0.774                  | 0.640               | 0.645                 |
|                |                   | MHPL [2]         | CVPR'23       | 0.779                      | 0.782                   | 0.654                     | 0.656                  | 0.780                | 0.784                  | 0.654               | 0.658                 |
| DML-Core [9]   |                   | NeurIPS'24       | 0.782         | 0.783                      | 0.658                   | 0.658                     | 0.782                  | 0.784                | 0.658                  | 0.658               |                       |
| Detective [11] | CVPR'24           | 0.781            | 0.784         | 0.657                      | 0.659                   | 0.782                     | 0.786                  | 0.658                | 0.661                  |                     |                       |
| STDR [3]       | IEEE TMI'24       | 0.777            | 0.781         | 0.652                      | 0.656                   | 0.778                     | 0.783                  | 0.653                | 0.658                  |                     |                       |
| Our FairAP     | -                 | <b>0.785*</b>    | <b>0.787*</b> | <b>0.661*</b>              | <b>0.663*</b>           | <b>0.786*</b>             | <b>0.789*</b>          | <b>0.661*</b>        | <b>0.664*</b>          |                     |                       |

Table 2. Ablation study of Optic cup and rim segmentation performance on the FairDomain-Segmentation dataset with **Gender** as the demographic attribute.

|     |                     | Method              | Overall ES-Dice $\uparrow$ | Overall Dice $\uparrow$ | Overall ES-IoU $\uparrow$ | Overall IoU $\uparrow$ | Male Dice $\uparrow$ | Female Dice $\uparrow$ | Male IoU $\uparrow$ | Female IoU $\uparrow$ |              |
|-----|---------------------|---------------------|----------------------------|-------------------------|---------------------------|------------------------|----------------------|------------------------|---------------------|-----------------------|--------------|
| Cup | Fair-Base           |                     | 0.832                      | 0.836                   | 0.734                     | 0.737                  | 0.838                | 0.834                  | 0.739               | 0.735                 |              |
|     | Fair-Attr           |                     | 0.831                      | 0.836                   | 0.732                     | 0.738                  | 0.841                | 0.833                  | 0.743               | 0.735                 |              |
|     | Fair-Poly           |                     | 0.834                      | 0.841                   | 0.735                     | 0.743                  | <b>0.846</b>         | 0.837                  | <b>0.749</b>        | 0.739                 |              |
|     | <b>Ours Fair-AP</b> |                     | <b>0.839</b>               | <b>0.843</b>            | <b>0.742</b>              | <b>0.746</b>           | 0.845                | <b>0.841</b>           | <b>0.749</b>        | <b>0.744</b>          |              |
| ADA | Rim                 | Fair-Base           |                            | 0.777                   | 0.783                     | 0.652                  | 0.658                | 0.778                  | 0.787               | 0.653                 | 0.662        |
|     |                     | Fair-Attr           |                            | 0.774                   | 0.780                     | 0.649                  | 0.655                | 0.776                  | 0.783               | 0.650                 | 0.659        |
|     |                     | Fair-Poly           |                            | 0.781                   | 0.784                     | 0.657                  | 0.659                | 0.782                  | 0.785               | 0.657                 | 0.660        |
|     |                     | <b>Ours Fair-AP</b> |                            | <b>0.785</b>            | <b>0.787</b>              | <b>0.661</b>           | <b>0.663</b>         | <b>0.786</b>           | <b>0.789</b>        | <b>0.661</b>          | <b>0.664</b> |

085 not only performs well in segmentation outcomes but also  
 086 effectively ensures algorithmic fairness.  
 087 **Ethnicity Attribute:** In Table 4, a similar trend is ob-  
 088 served: our Fair-AP model preserves fairness robustness  
 089 while achieving competitive performance gains in segmen-  
 090 tation tasks, even under imbalanced distribution scenarios.

### 091 3. Comparison Methods

092 We conducted a series comparisons of Fair-AP with leading  
 093 DA techniques, including Pixmatch [6], DAFormer [4], and  
 094 DAFormer-FIA [7], as well as ADA approaches like En-  
 095 tropy [10], MHPL [2], DML-Core [9], Detective [11], and  
 096 STDR [3]. The details of these methods are summarized as

follows:

**Pixmatch [6]:** Pixmatch introduces a novel unsupervised  
 domain adaptation framework that enhances model perfor-  
 mance on target domains by ensuring consistency in predic-  
 tions under small input perturbations.

**DAFormer [4]:** DAFormer introduces a Transformer-based  
 encoder-decoder architecture with three key training strate-  
 gies—Rare Class Sampling, Thing-Class ImageNet Feature  
 Distance, and learning rate warmup—to stabilize training  
 and mitigate overfitting in unsupervised domain adaptation  
 (UDA) for semantic segmentation.

**DAFormer-FIA [7]:** DAFormer-FIA introduces a novel  
 Fair Identity Attention (FIA) module and the first fairness-

Table 3. Ablation study of Optic cup and rim segmentation performance on the FairDomain-Segmentation dataset with **Race** as the demographic attribute.

| Method  |                     | Overall ES-Dice↑ | Overall Dice↑ | Overall ES-IoU↑ | Overall IoU↑ | Asian Dice↑  | Black Dice↑  | White Dice↑  | Asian IoU↑   | Black IoU↑   | White IoU↑   |
|---------|---------------------|------------------|---------------|-----------------|--------------|--------------|--------------|--------------|--------------|--------------|--------------|
| Cup     | Fair-Base           | 0.816            | 0.836         | 0.714           | 0.736        | 0.815        | 0.837        | 0.838        | 0.712        | 0.742        | 0.738        |
|         | Fair-Attr           | 0.810            | 0.836         | 0.719           | 0.739        | 0.818        | 0.825        | 0.840        | 0.721        | 0.733        | 0.742        |
|         | Fair-Poly           | 0.819            | 0.840         | 0.721           | 0.742        | 0.818        | 0.839        | 0.842        | 0.718        | 0.744        | 0.744        |
|         | <b>Ours Fair-AP</b> | <b>0.828</b>     | <b>0.843</b>  | <b>0.731</b>    | <b>0.747</b> | <b>0.827</b> | <b>0.843</b> | <b>0.845</b> | <b>0.730</b> | <b>0.751</b> | <b>0.748</b> |
| ADA Rim | Fair-Base           | 0.701            | 0.786         | 0.581           | 0.661        | 0.739        | 0.729        | 0.803        | 0.608        | 0.596        | 0.680        |
|         | Fair-Attr           | 0.690            | 0.778         | 0.572           | 0.651        | 0.738        | 0.709        | 0.796        | 0.610        | 0.574        | 0.672        |
|         | Fair-Poly           | 0.699            | 0.789         | 0.579           | 0.664        | 0.740        | 0.726        | <b>0.807</b> | 0.611        | 0.592        | 0.685        |
|         | <b>Ours Fair-AP</b> | <b>0.711</b>     | <b>0.791</b>  | <b>0.592</b>    | <b>0.667</b> | <b>0.750</b> | <b>0.735</b> | <b>0.807</b> | <b>0.624</b> | <b>0.602</b> | <b>0.686</b> |

Table 4. Ablation study of Optic cup and rim segmentation performance on the FairDomain-Segmentation dataset with **Ethnicity** as the demographic attribute.

| Method  |                     | Overall ES-Dice↑ | Overall Dice↑ | Overall ES-IoU↑ | Overall IoU↑ | Hispanic Dice↑ | Non-Hispanic Dice↑ | Hispanic IoU↑ | Non-Hispanic IoU↑ |
|---------|---------------------|------------------|---------------|-----------------|--------------|----------------|--------------------|---------------|-------------------|
| Cup     | Fair-Base           | 0.822            | 0.838         | 0.719           | 0.738        | <b>0.854</b>   | 0.836              | <b>0.762</b>  | 0.735             |
|         | Fair-Attr           | 0.822            | 0.833         | 0.717           | 0.732        | 0.845          | 0.832              | 0.751         | 0.730             |
|         | Fair-Poly           | 0.822            | 0.835         | 0.717           | 0.735        | 0.849          | 0.833              | 0.758         | 0.733             |
|         | <b>Ours Fair-AP</b> | <b>0.836</b>     | <b>0.840</b>  | <b>0.730</b>    | <b>0.743</b> | 0.844          | <b>0.839</b>       | 0.759         | <b>0.741</b>      |
| ADA Rim | Fair-Base           | 0.778            | 0.786         | 0.656           | 0.661        | 0.794          | 0.784              | 0.667         | 0.659             |
|         | Fair-Attr           | 0.781            | 0.784         | 0.657           | 0.659        | 0.786          | 0.782              | 0.658         | 0.658             |
|         | Fair-Poly           | 0.777            | 0.786         | 0.655           | 0.663        | <b>0.797</b>   | 0.784              | 0.672         | 0.661             |
|         | <b>Ours Fair-AP</b> | <b>0.784</b>     | <b>0.790</b>  | <b>0.663</b>    | <b>0.668</b> | 0.796          | <b>0.788</b>       | <b>0.673</b>  | <b>0.666</b>      |

110 focused paired imaging dataset to enhance algorithmic fair-  
 111 ness under domain shifts in medical AI, significantly im-  
 112 proving performance across demographics in both domain  
 113 adaptation (DA) and domain generalization (DG) tasks.

114 **Entropy [10]:**The AdvEnt method [10] is employed to cal-  
 115 culate the prediction map entropy for each sample within  
 116 the target domain, and those samples with the highest en-  
 117 tropy are selected for manual annotation.

118 **MHPL [2]:** MHPL introduces a novel active source-free  
 119 domain adaptation approach by identifying and exploiting  
 120 "minimum happy points" through tailored selection strate-  
 121 gies and a neighbor focal loss, achieving significant perfor-  
 122 mance gains with minimal labeling effort.

123 **DML-Core [9]:**DML-Core introduces a slice-based active  
 124 learning method integrating deep metric learning with Core-  
 125 set, significantly reducing annotation costs for 3D medical  
 126 segmentation while achieving high performance under low  
 127 annotation budgets.

128 **Detective [11]:**Detective introduces a dynamic domain  
 129 adaptation model with evidential uncertainty valuation and  
 130 contextual diversity enhancement, effectively selecting in-  
 131 formative target samples by jointly evaluating domain shifts  
 132 and prediction confidence.

133 **STDR [3]:** STDR improves gross tumor volume seg-  
 134 mentation for nasopharyngeal carcinoma by employing a  
 135 dual reference strategy to select and annotate representative  
 136 target-domain samples, enabling effective source-free do-  
 137 main adaptation while ensuring data privacy and minimiz-

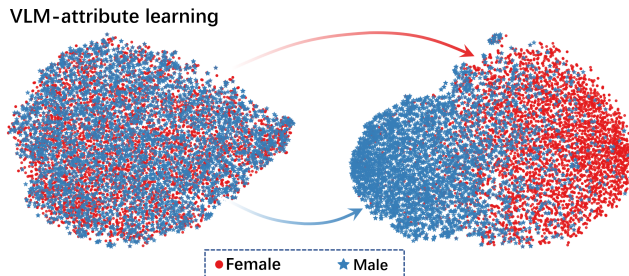

Figure 1. Visualization of gender feature distribution before and after feature alignment via VLM-attribute learning.

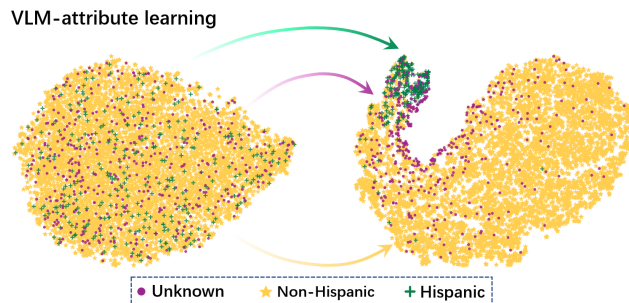

Figure 2. Visualization of ethnic feature distribution before and after feature alignment via VLM-attribute learning.

ing the annotation effort.

#### 4. More Visualizations

The t-SNE visualizations [8] of sample distributions be-  
 fore and after feature alignment via VLM-attribute learning

142 for gender and ethnic attributes are depicted in Fig. 1 and  
 143 Fig. 2. Our VLM-attribute learning results in a more con-  
 144 centrated distribution of features across different subgroups,  
 145 thus improving the distinguishability of features associated  
 146 with various attributes. In Fig. 1, we note that male and  
 147 female samples were effectively distinguished after VLM-  
 148 attribute learning. We also notice a balanced representation  
 149 of male and female samples, which aids in the subsequent  
 150 active selection strategy. Conversely, in Fig. 2, the ethnic  
 151 proportions are uneven, and the distribution of Unknown  
 152 samples is irregular, causing significant degradation in the  
 153 ablation study results when either representativeness or di-  
 154 versity is considered in isolation. Our proposed Fair-AP  
 155 method achieves success in both segmentation performance  
 156 and fairness, even when subgroup proportions are imbal-  
 157 anced and sample distributions are irregular.

158 **References**

159 [1] Fairseg: A large-scale medical image segmentation dataset  
 160 for fairness learning using segment anything model with fair  
 161 error-bound scaling. In *ICLR*. 1  
 162 [2] Mhpl: Minimum happy points learning for active source free  
 163 domain adaptation. In *CVPR*, 2023. 2, 3  
 164 [3] Dual-reference source-free active domain adaptation for na-  
 165 sopharyngeal carcinoma tumor segmentation across multiple  
 166 hospitals. *IEEE Transactions on Medical Imaging*, 2024. 2,  
 167 3  
 168 [4] Lukas Hoyer, Dengxin Dai, and Luc Van Gool. Daformer:  
 169 Improving network architectures and training strategies for  
 170 domain-adaptive semantic segmentation. In *Proceedings of*  
 171 *the IEEE/CVF conference on computer vision and pattern*  
 172 *recognition*, pages 9924–9935, 2022. 2  
 173 [5] Yan Luo, Yu Tian, Min Shi, Louis R Pasquale, Lucy Q Shen,  
 174 Nazlee Zebardast, Tobias Elze, and Mengyu Wang. Harvard  
 175 glaucoma fairness: a retinal nerve disease dataset for fairness  
 176 learning and fair identity normalization. *IEEE Transactions*  
 177 *on Medical Imaging*, 2024. 1  
 178 [6] Luke Melas-Kyriazi and Arjun K Manrai. Pixmatch: Unsu-  
 179 pervised domain adaptation via pixelwise consistency train-  
 180 ing. In *Proceedings of the IEEE/CVF Conference on Com-*  
 181 *puter Vision and Pattern Recognition*, pages 12435–12445,  
 182 2021. 2  
 183 [7] Yu Tian, Congcong Wen, Min Shi, Muhammad Muneeb  
 184 Afzal, Hao Huang, Muhammad Osama Khan, Yan Luo, Yi  
 185 Fang, and Mengyu Wang. Fairdomain: Achieving fairness  
 186 in cross-domain medical image segmentation and classifica-  
 187 tion. In *European Conference on Computer Vision*, pages  
 188 251–271. Springer, 2024. 1, 2  
 189 [8] Laurens Van der Maaten and Geoffrey Hinton. Visualizing  
 190 data using t-sne. *Journal of machine learning research*, 9  
 191 (11), 2008. 3  
 192 [9] Arvind Vepa, Zukang Yang, Andrew Choi, Jungseock Joo,  
 193 Fabien Scalzo, and Yizhou Sun. Integrating deep metric  
 194 learning with coreset for active learning in 3d segmenta-  
 195 tion. *Advances in Neural Information Processing Systems*,  
 196 37:71643–71671, 2024. 2, 3

[10] Tuan-Hung Vu, Himalaya Jain, Maxime Bucher, Matthieu  
 Cord, and Patrick Pérez. Advent: Adversarial entropy min-  
 imization for domain adaptation in semantic segmentation.  
 In *Proceedings of the IEEE/CVF conference on computer vi-*  
*sion and pattern recognition*, pages 2517–2526, 2019. 2, 3  
 [11] Wenqiao Zhang, Zheqi Lv, Hao Zhou, Jia-Wei Liu, Juncheng  
 Li, Mengze Li, Yunfei Li, Dongping Zhang, Yueting Zhuang,  
 and Siliang Tang. Revisiting the domain shift and sample  
 uncertainty in multi-source active domain transfer. In *Pro-*  
*ceedings of the IEEE/CVF Conference on Computer Vision*  
*and Pattern Recognition*, pages 16751–16761, 2024. 2, 3
